# Supplementary material
Source: PubMed Central journal article supplement (PMC9250031)

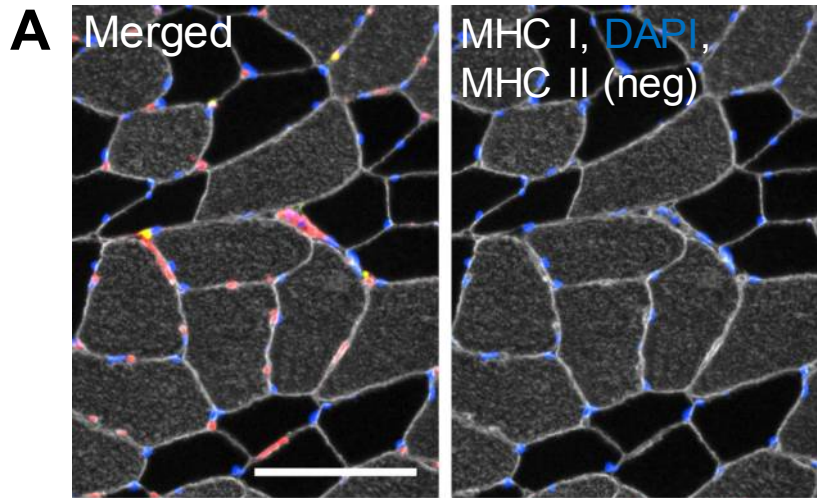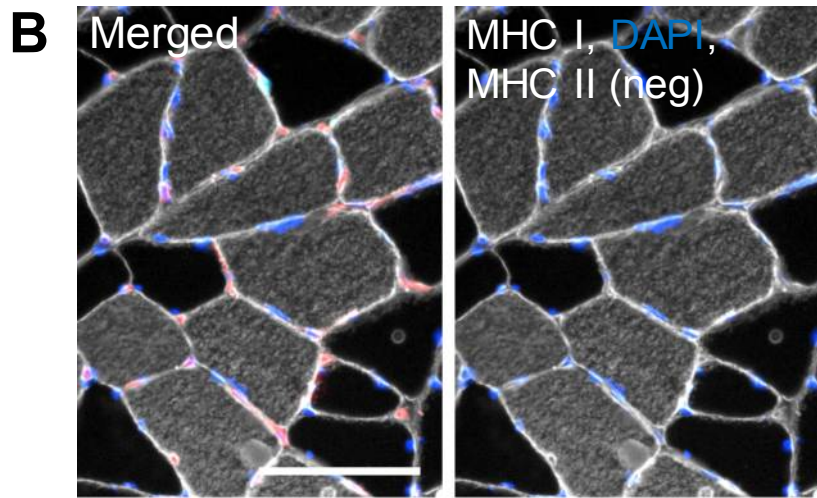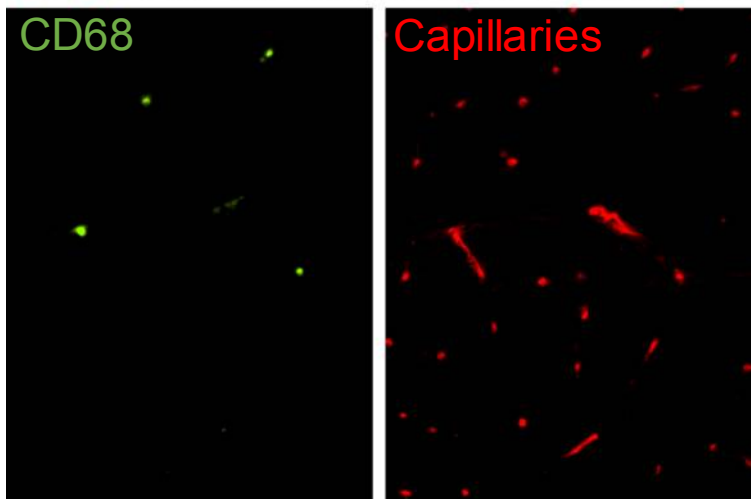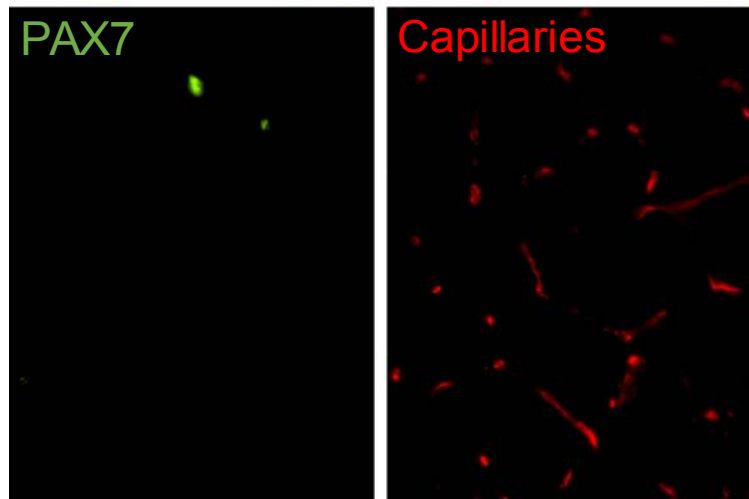

Supplement: NIHMS1816517-supplement-Supplement_1.pdf [file NIHMS1816517-supplement-Supplement_1.pdf]

**CD11b-AF488****CD206-Cy3****Merged****All Merged**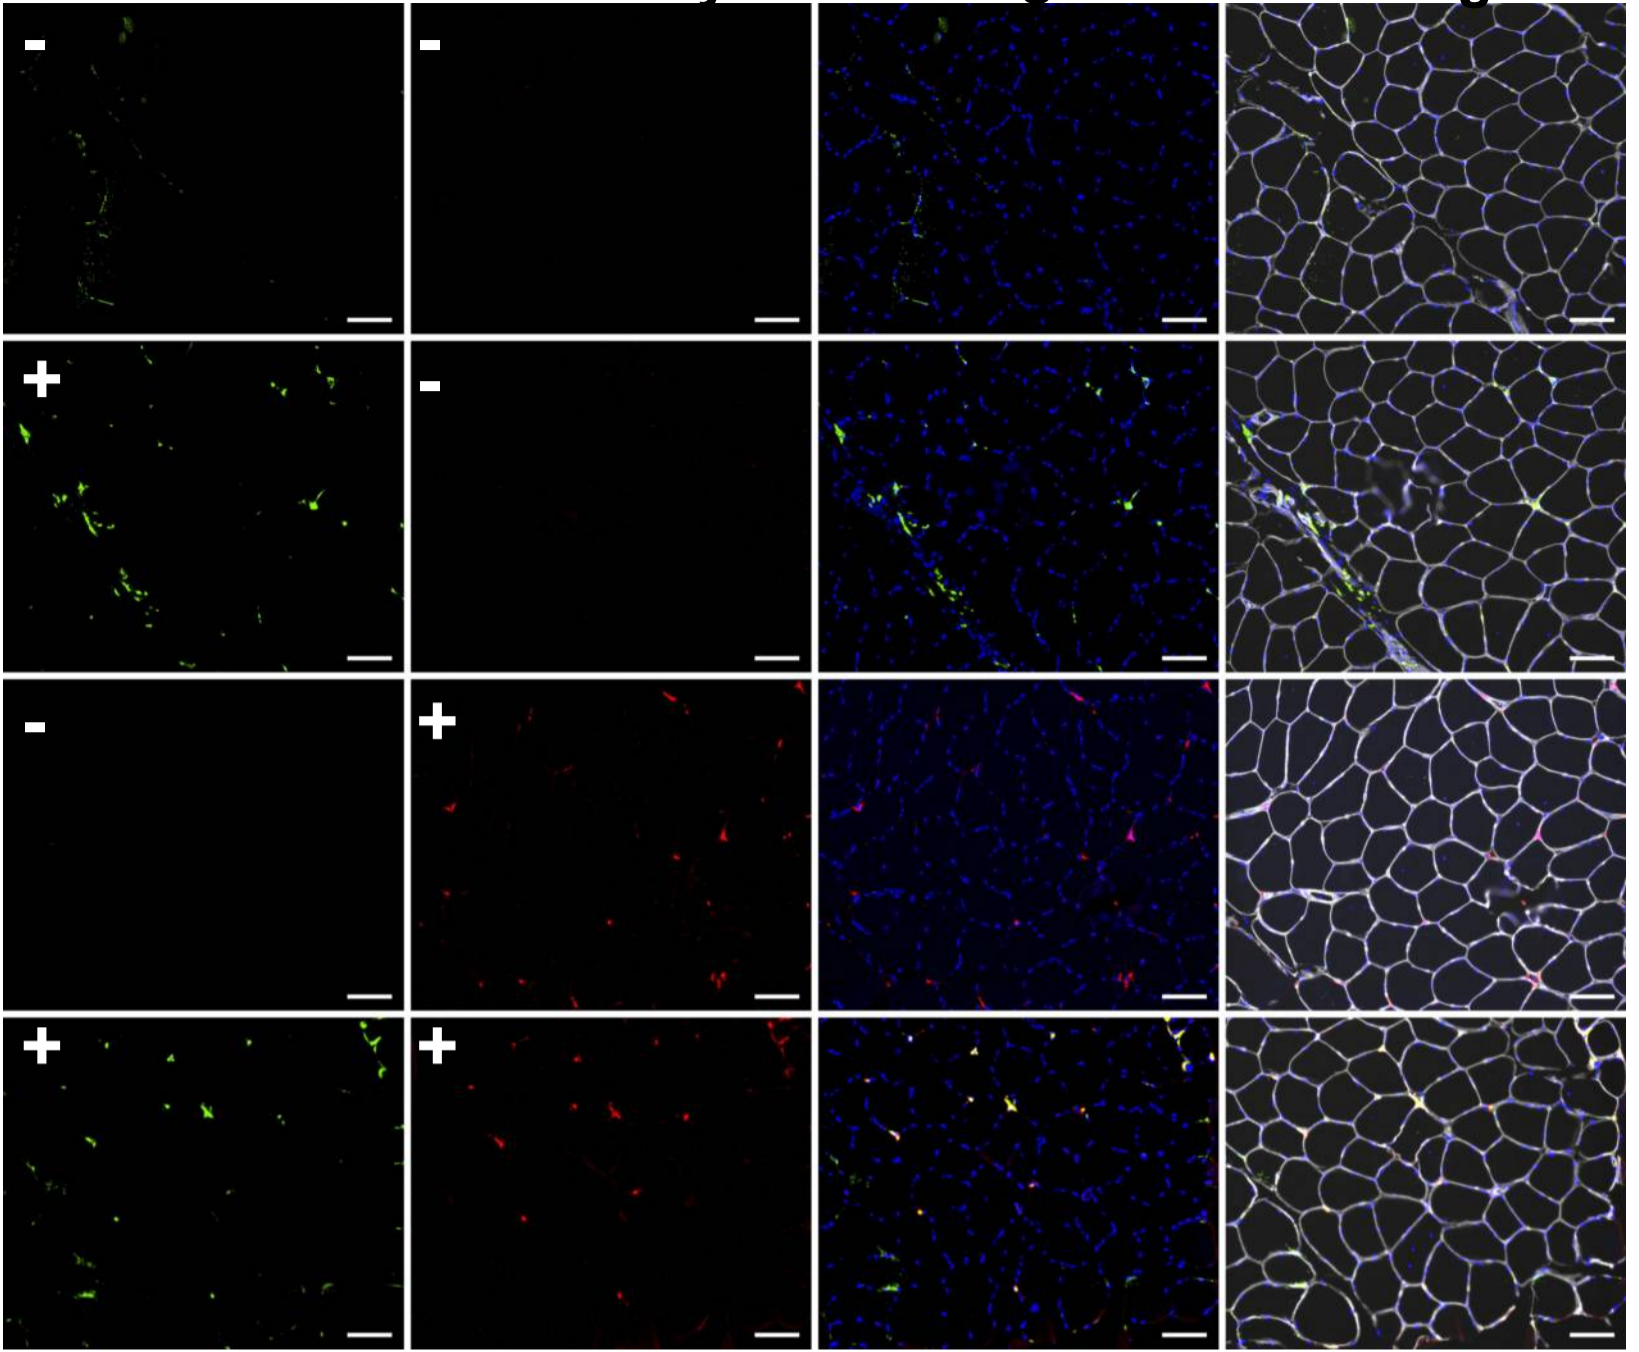**CD68-AF488****CD206-Cy3****Merged****All Merged**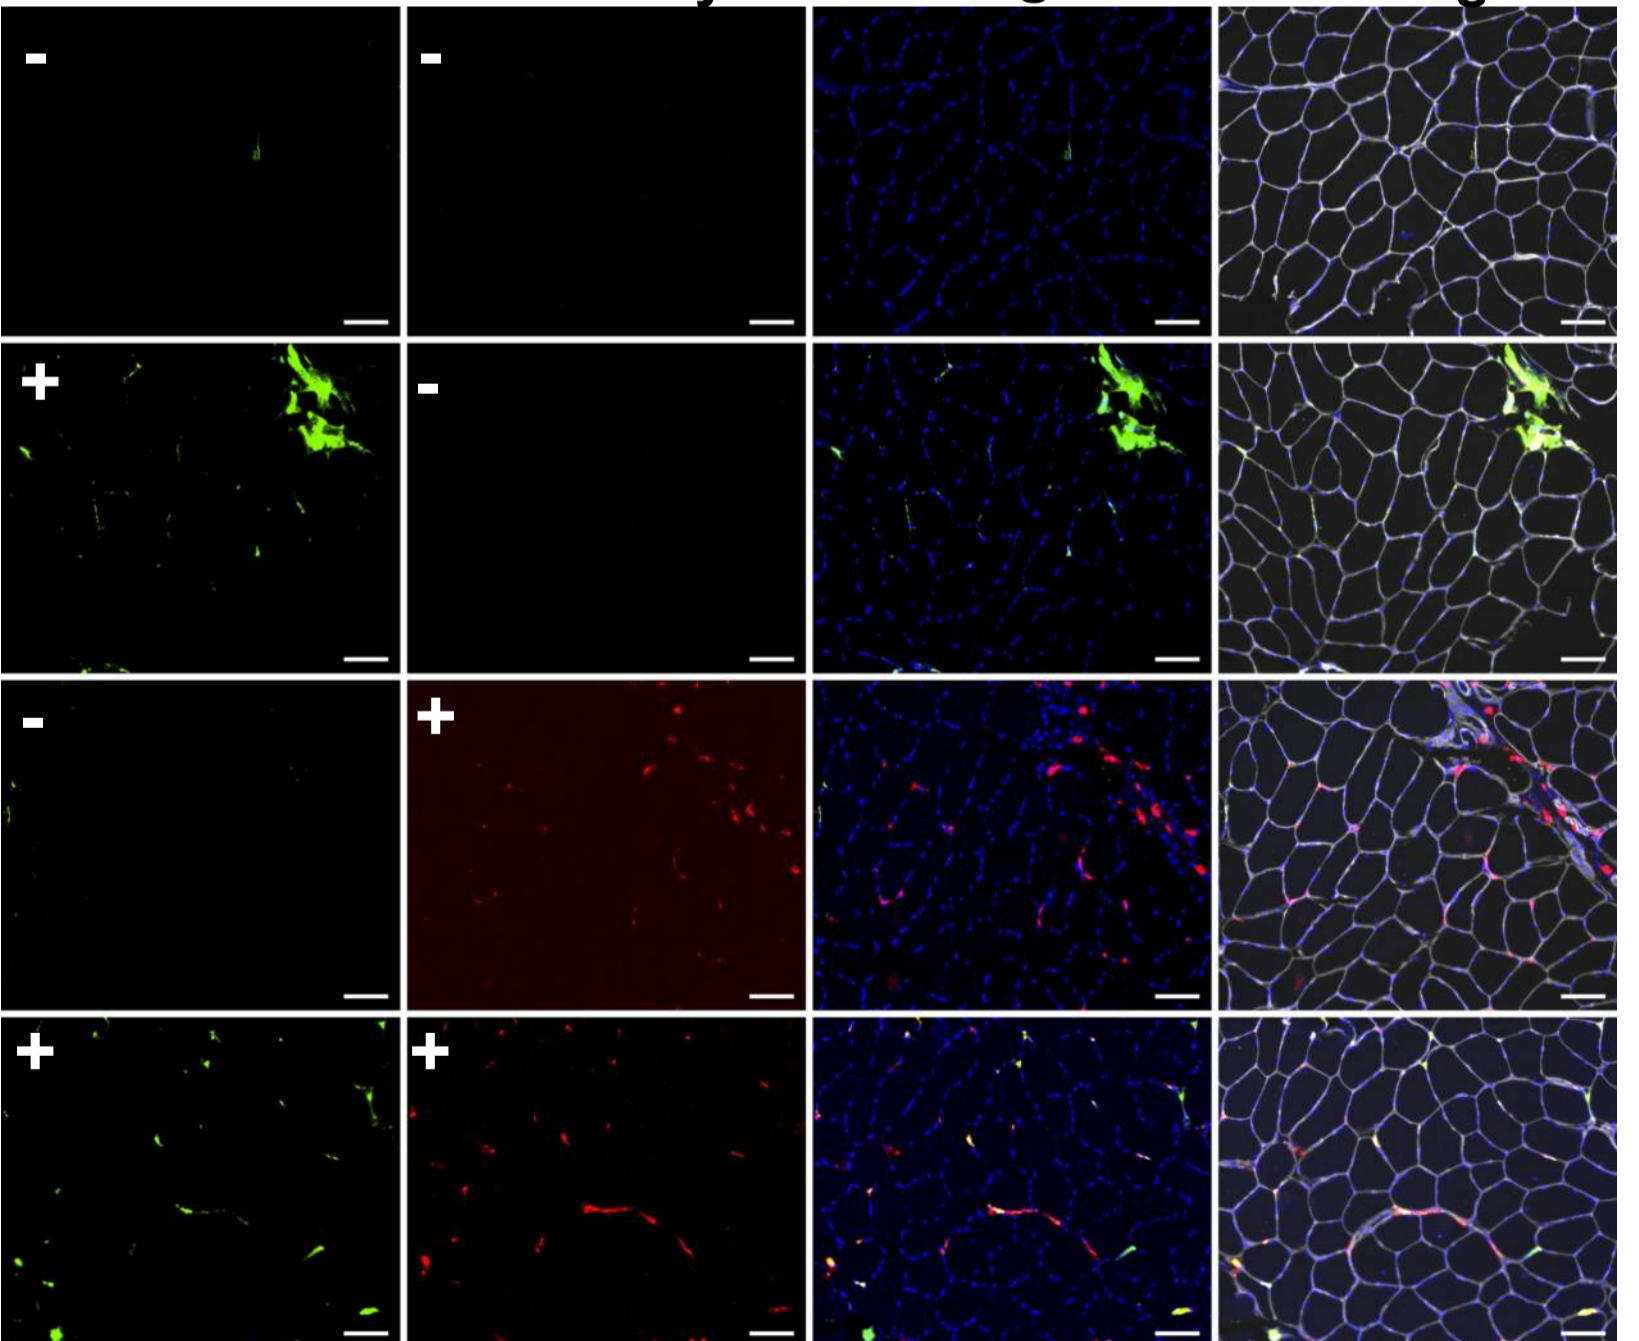

Supplement: NIHMS1816517-supplement-Supplement_2.pdf [file NIHMS1816517-supplement-Supplement_2.pdf]
